# Supplementary material for: An Aspergillus nidulans β-mannanase with high transglycosylation capacity revealed through comparative studies within glycosidase family 5
Source: PubMed Central journal article supplement (PMC4237917; doi:10.1007/s00253-014-5871-8), 2014-06-21
Supplement: 253_2014_5871_MOESM1_ESM.pdf [file 253_2014_5871_MOESM1_ESM.pdf]

**Electronic supplementary material**  
**Applied Microbiology and Biotechnology**

**An *Aspergillus nidulans*  $\beta$ -mannanase with high transglycosylation capacity revealed through comparative studies within glycosidase family 5**

Anna Rosengren<sup>1</sup>, Sumitha K. Reddy<sup>1</sup>, Johan Svantesson Sjöberg<sup>1</sup>, Oskar Aurelius<sup>1</sup>, Derek T. Logan<sup>1</sup>, Katarína Kolenová<sup>1,2</sup> and Henrik Stålbrand<sup>1#</sup>

<sup>1</sup>Department of Biochemistry and Structural Biology, Lund University,  
P.O. Box 124, S-221 00, Lund, Sweden

<sup>2</sup>Present address: Institute of Chemistry, Center for Glycomics, Slovak Academy of Sciences, Dúbravská cesta 9,  
845 38 Bratislava, Slovakia

<sup>#</sup>To whom correspondence should be addressed:  
Henrik.Stalbrand@biochemistry.lu.se, Tel: +46-46-222 8202, Fax +46-46-2224116

**Supplemental Table S1** Quality parameters of the AnMan5B homology model, evaluated with MolProbity. For comparison the values for the template are shown in parenthesis.

| AnMan5B model (template, 1QNR) |                   |
|--------------------------------|-------------------|
| Number of residues             | 350 (344)         |
| Sequence identity              | 48 % (-)          |
| Ramachandran favored           | 92.82 % (97.37 %) |
| Ramachandran outliers          | 1.72 % (0.00 %)   |
| Poor rotamers                  | 5.72 % (0.71 %)   |
| Clashscore                     | 27.44 (4.53)      |
| Residues with bad bonds        | 0.29 % (0.29 %)   |
| Residues with bad angles       | 2.86 % (1.74 %)   |

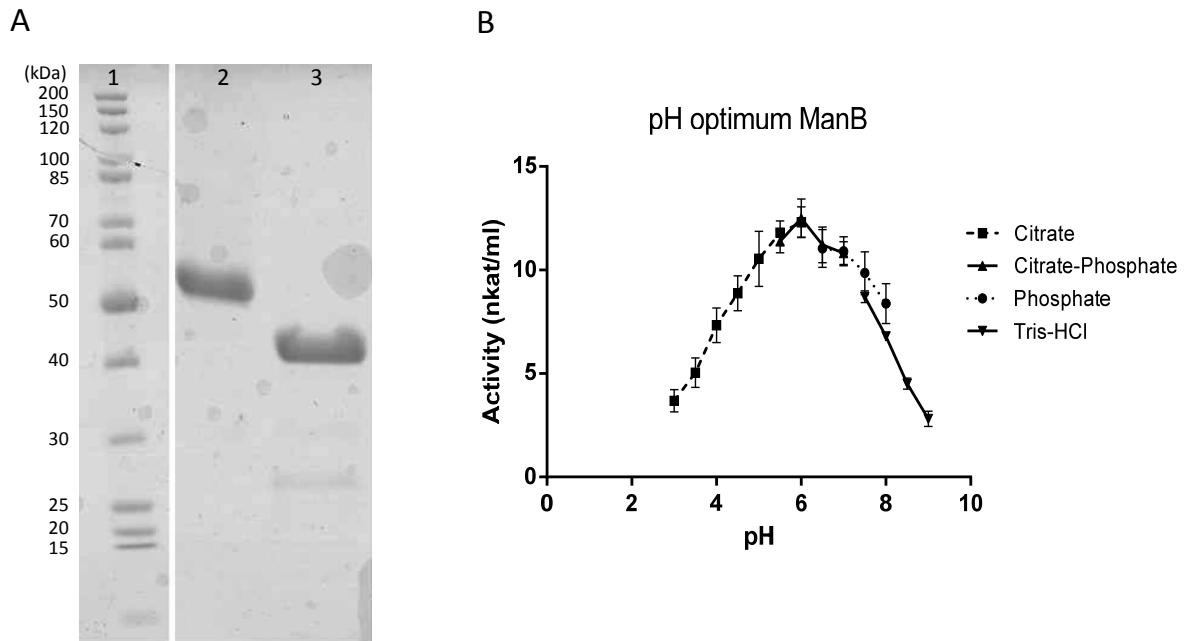

**Supplemental Fig. S1 a**; SDS-PAGE from the deglycosylation study showing molecular weight marker (1), purified AnMan5B (2) and purified AnMan5B treated with endoH (3). **b**; pH optimum for AnMan5B, using LBG as substrate.

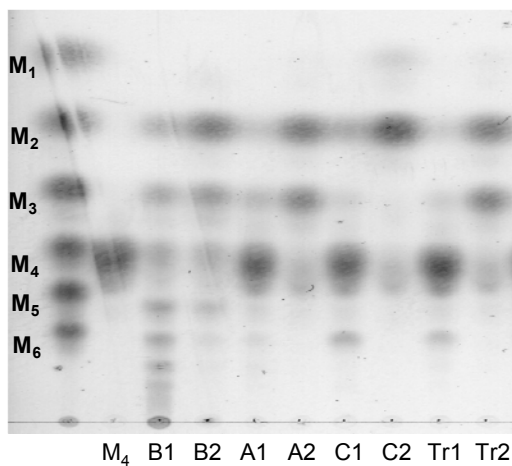

**Supplemental Fig. S2** TLC analysis of 5 mM  $M_4$  incubation for 0.5 h, using two different enzyme loads, based on activity on LBG. AnMan5B; B1: 450 nM and B2: 9045 nM, AnMan5A; A1: 15 nM and A2 290 nM, AnMan5C; C1: 15 nM and C2: 300 nM and TrMan5A; Tr1: 9 nM and Tr2: 190 nM. Standard manno-oligosaccharides  $M_1$ - $M_6$  are shown to the left.

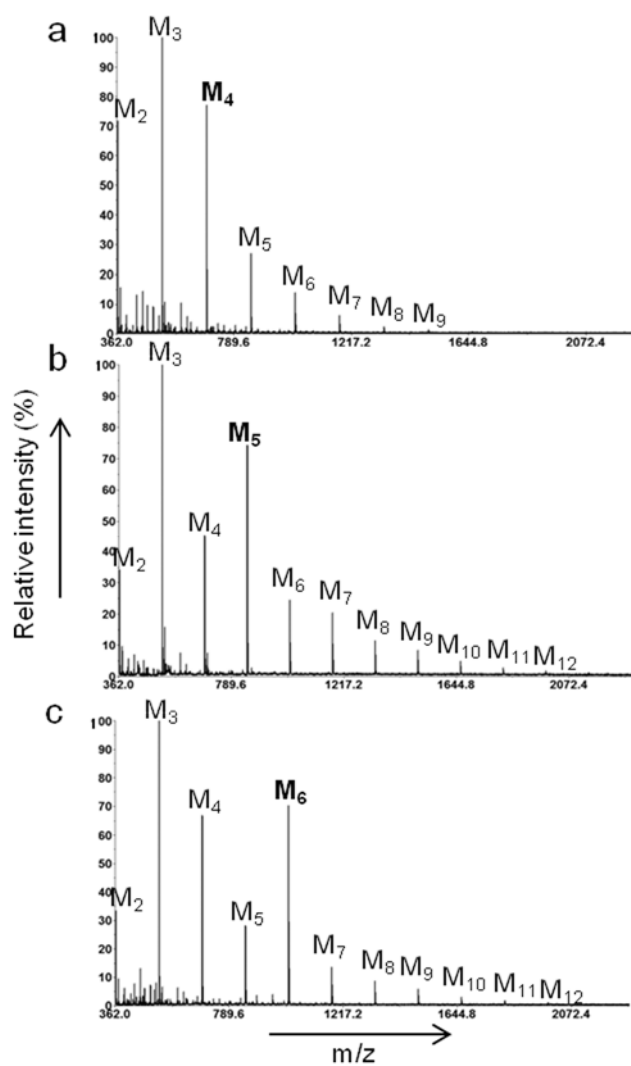

**Supplemental Fig. S3** MALDI-TOF MS spectra of AnMan5B incubations in H<sub>2</sub><sup>18</sup>O with **a**; M<sub>4</sub> 60 min, **b**; M<sub>5</sub> 60 min and **c**; M<sub>6</sub> 30 min. Products with lower DP than the substrates are present in the spectra, as well as transglycosylation products up to DP9 (a) and DP12 (b, c). No <sup>18</sup>O-labeled oligosaccharide was detected.
